# Supplementary material for: Tailoring graphene-supported Ru nanoparticles by functionalization with pyrene-tagged N-heterocyclic carbenes
Source: Royal Society of Chemistry journal article supplement (doi:10.1039/d1cy02063c), 2021-12-27
Supplement: d1cy02063c1.pdf [file d1cy02063c1.pdf]

## † Electronic Supplementary Information (ESI)

# Tailoring graphene-supported Ru nanoparticles by functionalization with pyrene-tagged N-heterocyclic carbenes

*Adrián García-Zaragoza,<sup>a,†</sup> Christian Cerezo-Navarrete,<sup>a,†</sup> Andrés Mollar-Cuni,<sup>b</sup> Pascual Oña-Burgos,<sup>a</sup> Jose A. Mata,<sup>b</sup> Avelino Corma<sup>a</sup> and Luis M. Martínez-Prieto<sup>a,\*</sup>*

<sup>a</sup> *ITQ, Instituto de Tecnología Química, Universitat Politècnica de València (UPV), Av. de los Naranjos S/N 46022, Valencia, Spain*

<sup>b</sup> *Institute of Advanced Materials (INAM), Universitat Jaume I, Avda. Sos Baynat S/N 12006, Castellón, Spain*

*† These authors contributed equally to this work.*

E-mail: [luismiguel.martinez@csic.es](mailto:luismiguel.martinez@csic.es) [acorma@itq.upv.es](mailto:acorma@itq.upv.es)

### Table of Content

|                                      |    |
|--------------------------------------|----|
| 1. TEM                               | 2  |
| 2. HRTEM                             | 3  |
| 3. Raman                             | 3  |
| 4. EA and BET surface area           | 4  |
| 5. TEM of ligand-stabilized Ru NPs   | 5  |
| 6. HRTEM of ligand-stabilized Ru NPs | 5  |
| 7. ICP-AES                           | 6  |
| 8. DRIFT                             | 6  |
| 9 MAS-NMR                            | 7  |
| 10. XPS                              | 8  |
| 11 TEM after catalysis               | 8  |
| 12 Ru@rGO/ICy                        | 9  |
| 13 Multiple addition experiment      | 11 |
| 14 “Hot Filtration”                  | 11 |

## 1. TEM

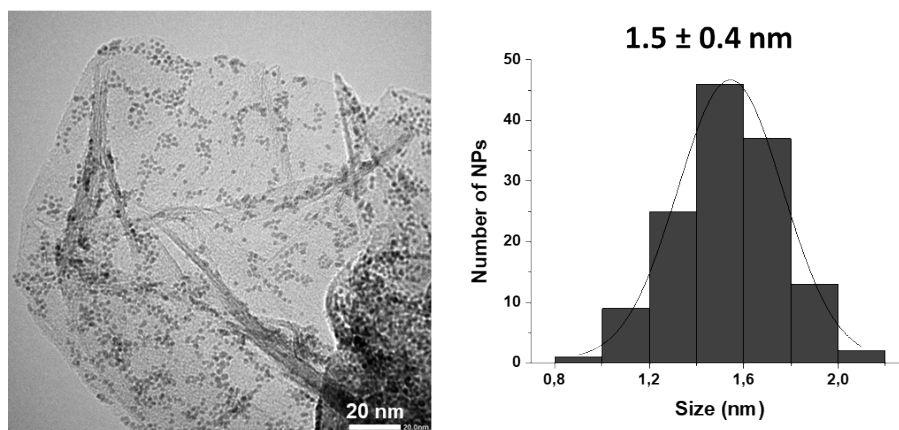

**Figure S1.** TEM image and size distribution histogram of Ru@rGO/pyr-IMes<sub>0.2</sub>.

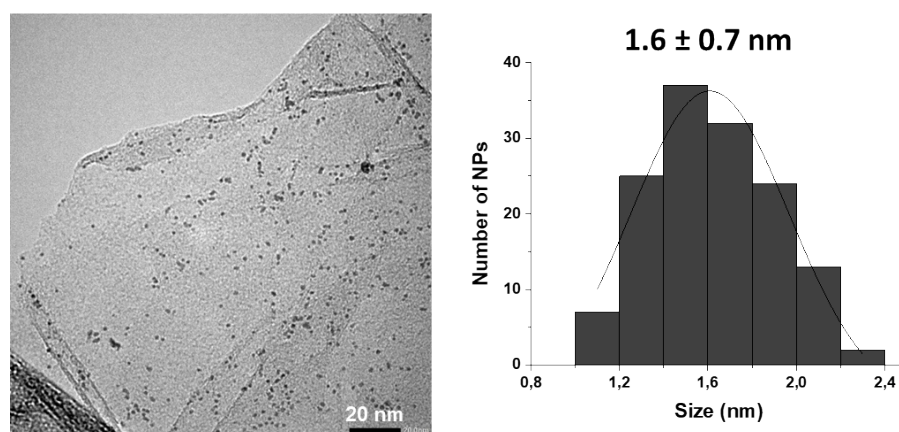

**Figure S2.** TEM image and size distribution histogram of Ru@rGO/pyr-IMes<sub>0.8</sub>.

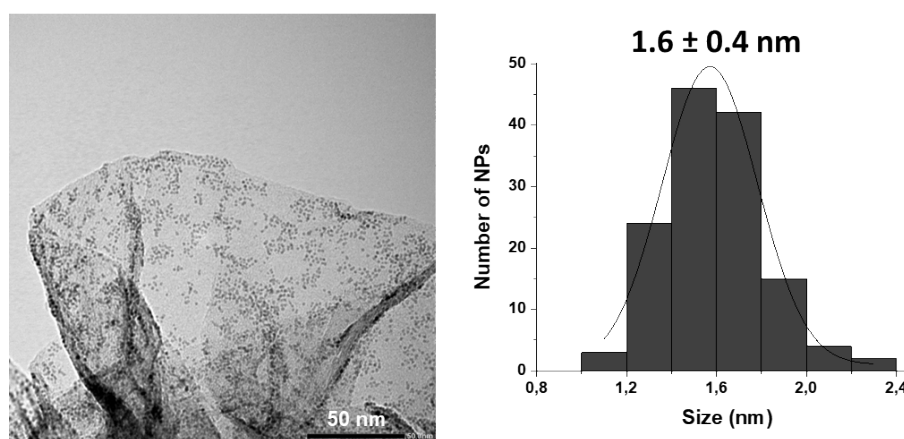

**Figure S3.** TEM image and size distribution histogram of Ru@rGO/pyr-IMes<sub>1</sub>.

## 2. HRTEM

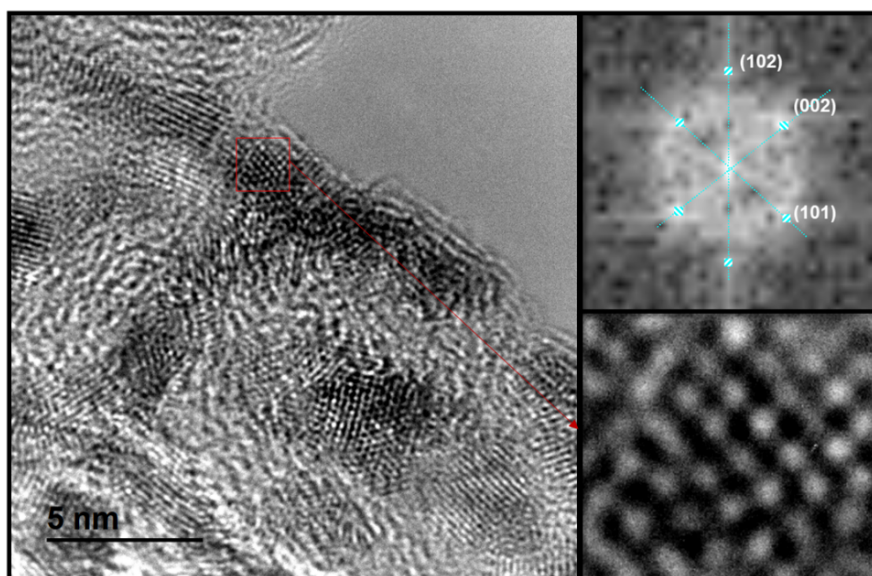

**Figure S4.** HRTEM micrographs of **Ru@rGO** (left, right bottom) and Fourier Transform Analysis with the planar reflections (right, top).

## 3. Raman

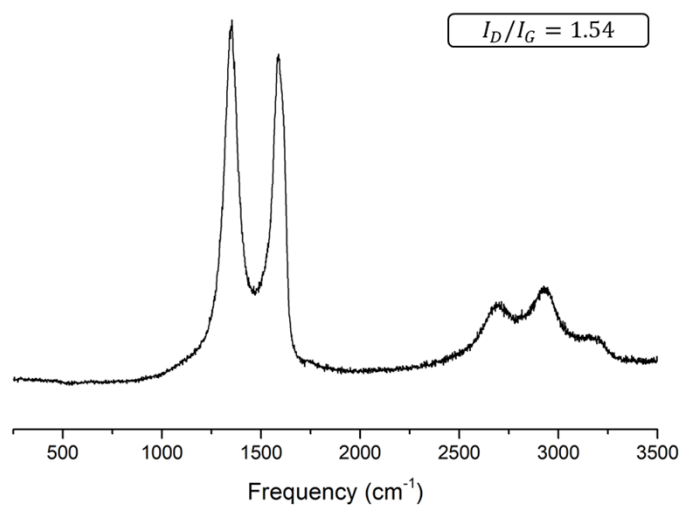

**Figure S5.** Raman spectrum and  $I_D/I_G$  ratio of **rGO**.

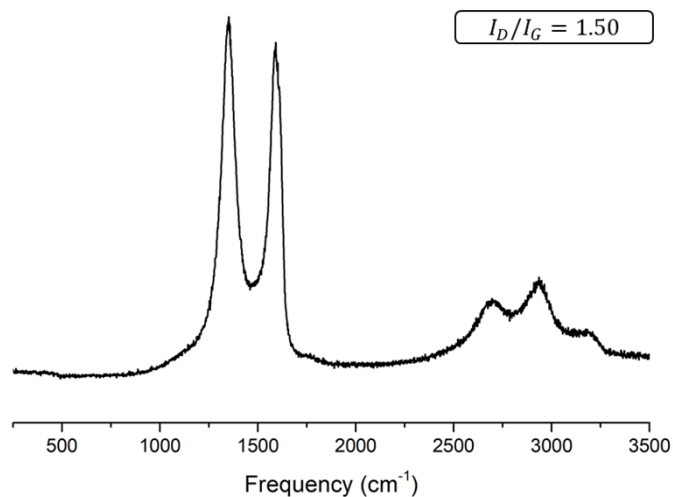

**Figure S6.** Raman spectrum and  $I_D/I_G$  ratio of **Ru@rGO**.

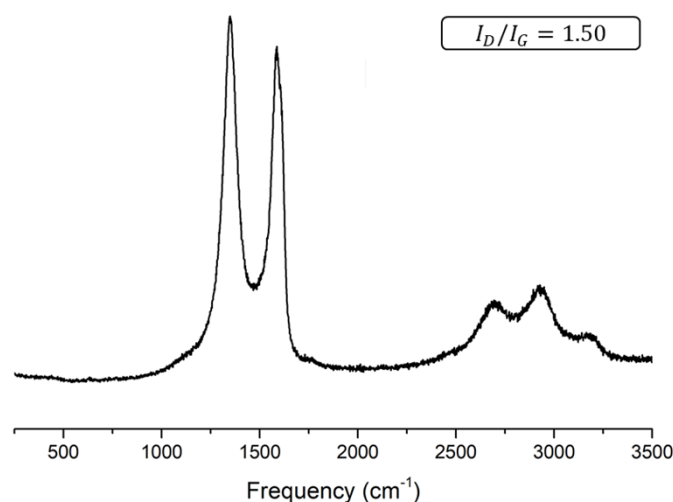

**Figure S7.** Raman spectrum and  $I_D/I_G$  ratio of **Ru@rGO/pyr-IMes<sub>0.5</sub>**.

#### 4. EA and BET surface area

**Table S1.** Elemental analysis (EA) and BET surface area of **Ru@rGO/pyr-IMes<sub>x</sub>**. Determination of the precise number of equiv. of pyr-IMes incorporated to **Ru@rGO**.

|                                                           | <b>Ru@rGO/pyr-IMes<sub>x</sub></b> |                      |                      |                      |
|-----------------------------------------------------------|------------------------------------|----------------------|----------------------|----------------------|
|                                                           | <b>X = 0.2</b>                     | <b>X = 0.5</b>       | <b>X = 0.8</b>       | <b>X = 1</b>         |
| <b>BET Surface area of Ru@rGO (nm<sup>2</sup>/100 mg)</b> | $3.32 \cdot 10^{19}$               | $3.32 \cdot 10^{19}$ | $3.32 \cdot 10^{19}$ | $3.32 \cdot 10^{19}$ |
| <b>EA (wt% N)</b>                                         | 2.38                               | 5.94                 | 9.50                 | 11.88                |
| <b>% N incorporated</b>                                   | 49.61                              | 52.47                | 49.58                | 50.34                |
| <b>pyr-IMes molecules per nm<sup>2</sup></b>              | 0.053                              | 0.141                | 0.214                | 0.271                |
| <b>Actual n° equiv. of pyr-IMes</b>                       | 0.099                              | 0.262                | 0.397                | 0.503                |

## 5. TEM of ligand-stabilized Ru NPs

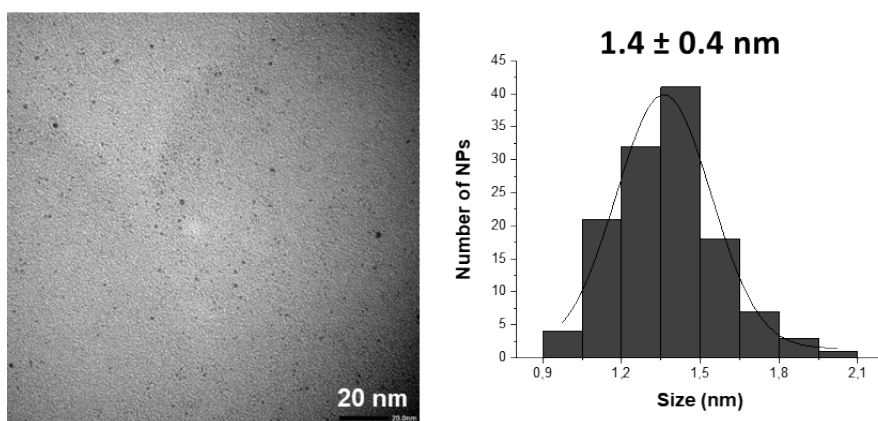

**Figure S8.** TEM image and size distribution histogram of **Ru/pyr-IMes<sub>0.2</sub>**.

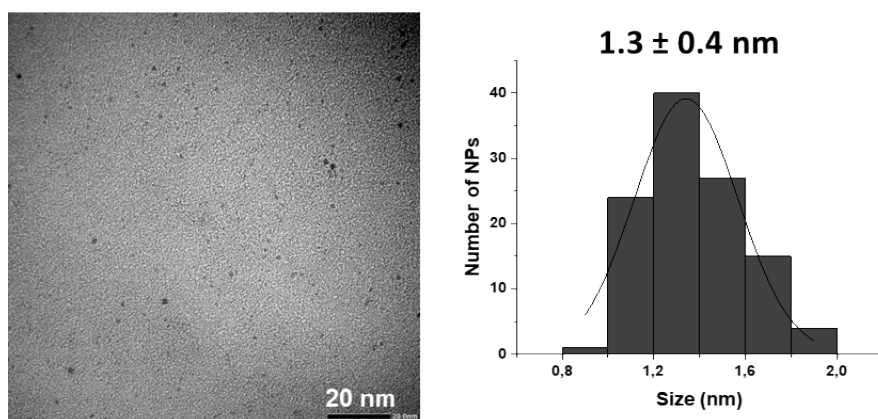

**Figure S9.** TEM image and size distribution histogram of **Ru/pyr-IMes<sub>0.5</sub>**.

## 6. HRTEM of ligand-stabilized Ru NPs

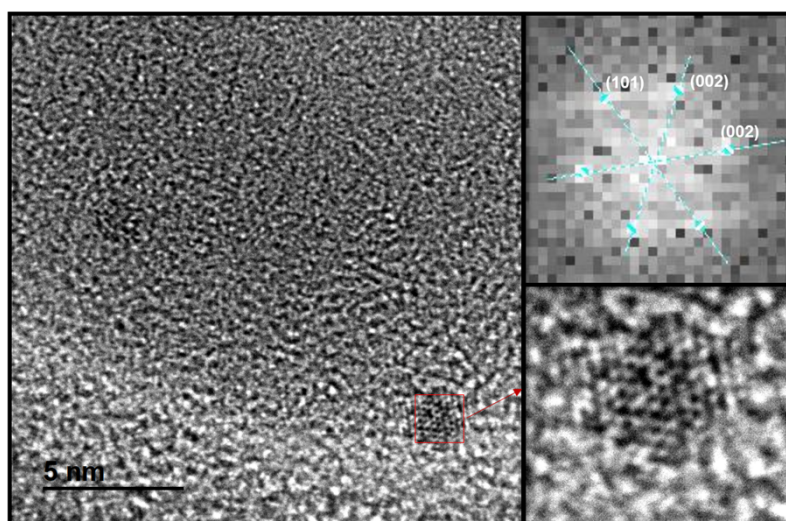

**Figure S10.** HRTEM micrographs of **Ru/pyr-IMes<sub>0.5</sub>** (left, right bottom) and Fourier Transform Analysis with the planar reflections (right, top).

## 7. ICP-AES

**Table S2.** ICP analysis for **Ru/pyr-IMes<sub>0.2</sub>** and **Ru/pyr-IMes<sub>0.5</sub>**.

|                                  | Size (nm) | Ru (wt%) <sup>[a]</sup> | Ru <sub>x</sub> :L <sub>y</sub> <sup>[b]</sup> | Ru <sub>x</sub> /L <sub>y</sub> | Ru <sub>(s)</sub> <sup>[c]</sup> | Ru <sub>(s)x</sub> /L <sub>y</sub> |
|----------------------------------|-----------|-------------------------|------------------------------------------------|---------------------------------|----------------------------------|------------------------------------|
| <b>Ru/pyr-IMes<sub>0.2</sub></b> | 1.4 ± 0.4 | 55.7                    | 91:18                                          | 5                               | 73                               | 4.06                               |
| <b>Ru/pyr-IMes<sub>0.5</sub></b> | 1.3 ± 0.4 | 33.2                    | 132:44                                         | 2                               | 62                               | 1.41                               |

[a] % of Ru obtained by ICP analysis. [b] The total number of atoms was determined calculating the unit cell of Ru (hcp) per MNP, based on the mean diameter measured by TEM. [c] Number of surface atoms. Approximate values obtained from ref.1.

## 8. DRIFT

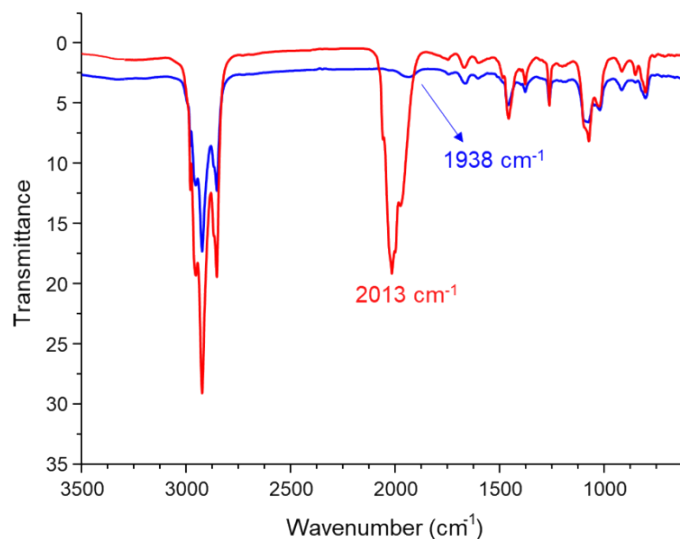

**Figure S11.** DRIFT spectra of a sample of **Ru/pyr-IMes<sub>0.2</sub>** before (blue) and after (red) exposure to CO (bubbling CO into a THF solution for 5 min).

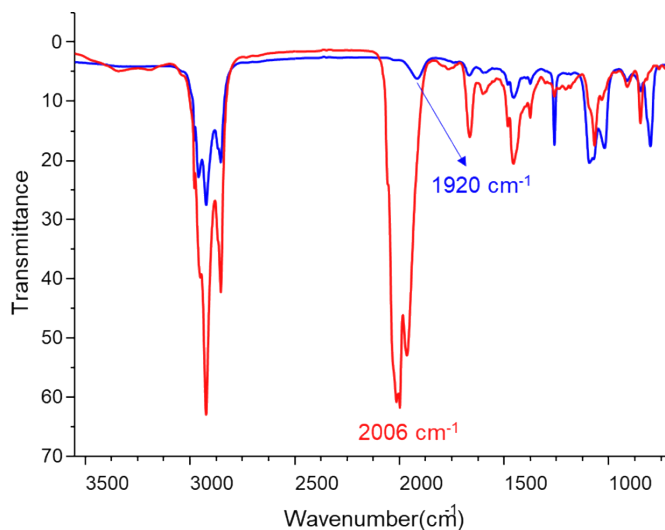

**Figure S12.** DRIFT spectra of a sample of **Ru/pyr-IMes<sub>0.5</sub>** before (blue) and after (red) exposure to CO (bubbling CO into a THF solution for 5 min).

## 9. MAS-NMR

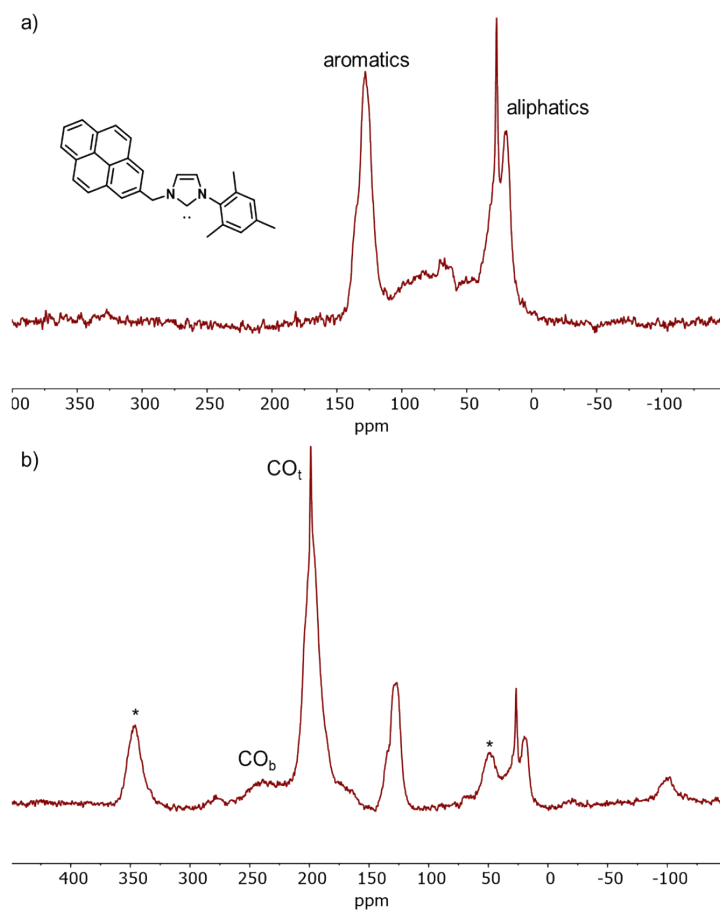

**Figure S13.**  $^{13}\text{C}\{^1\text{H}\}$  CP-MAS NMR spectra for Ru/pyr-IMes<sub>0.2</sub> (a) before and (b) after exposure to  $^{13}\text{CO}$  (1bar,  $^{13}\text{CO}$ , 20h, r.t.). Asterisks mark the positions of spinning side bands (\*).

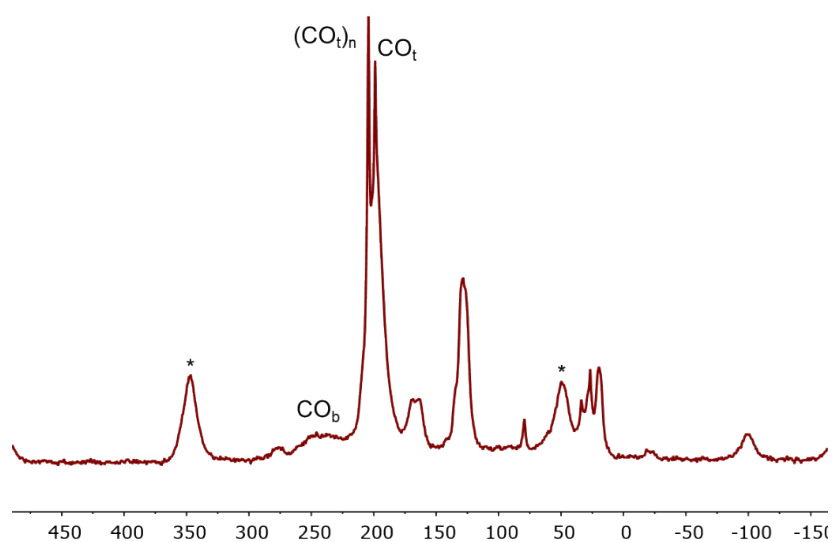

**Figure S14.** C-MAS NMR spectra for Ru/pyr-IMes<sub>0.5</sub> after exposure to  $^{13}\text{CO}$  (1bar  $^{13}\text{CO}$ , 20h, r.t.). Asterisks mark the positions of spinning side bands (\*).

## 10. XPS

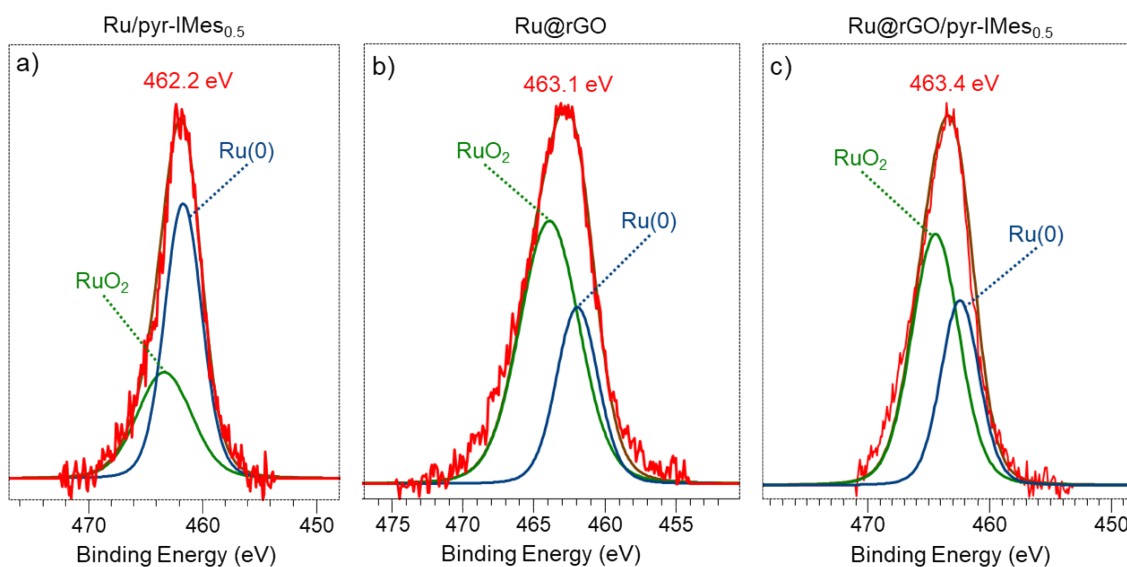

**Figure S15.** X-ray photoelectron spectroscopy (XPS) of the Ru 3p<sub>3/2</sub> signals of (a) Ru/pyr-IMes<sub>0.5</sub>, (b) Ru@rGO and (c) Ru@rGO/pyr-IMes<sub>0.5</sub>.

## 11. TEM after catalysis

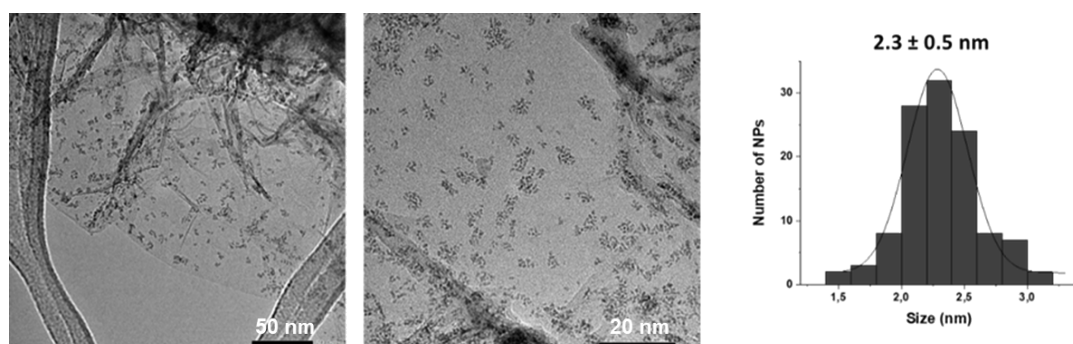

**Figure S16.** TEM images and size histogram of Ru@rGO after catalysis.

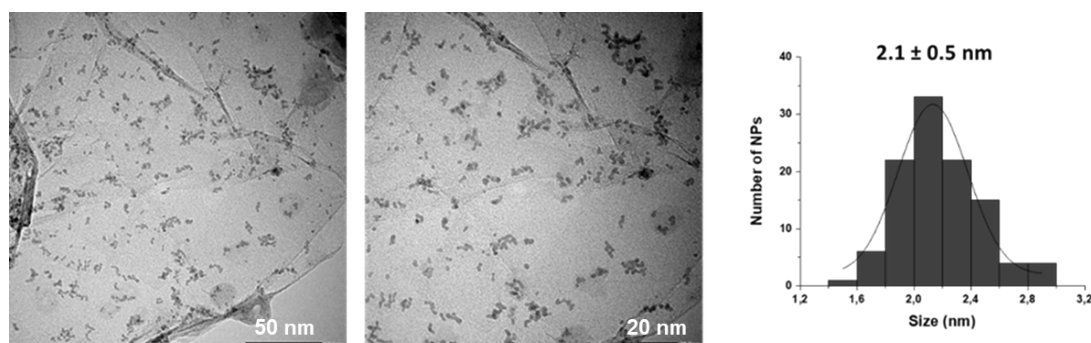

**Figure S17.** TEM images and size histogram of Ru@rGO/pyr-IMes<sub>0.2</sub> after catalysis.



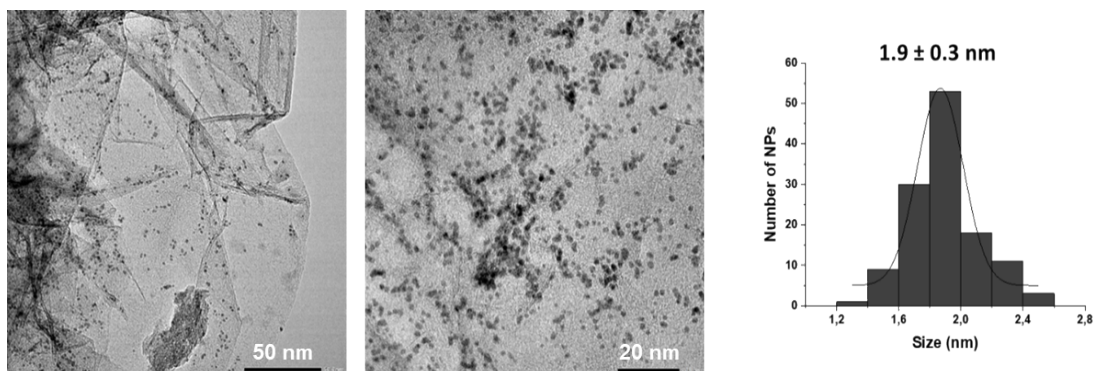

**Figure S18.** TEM images and size histogram of Ru@rGO/pyr-IMes<sub>0.5</sub> after catalysis.

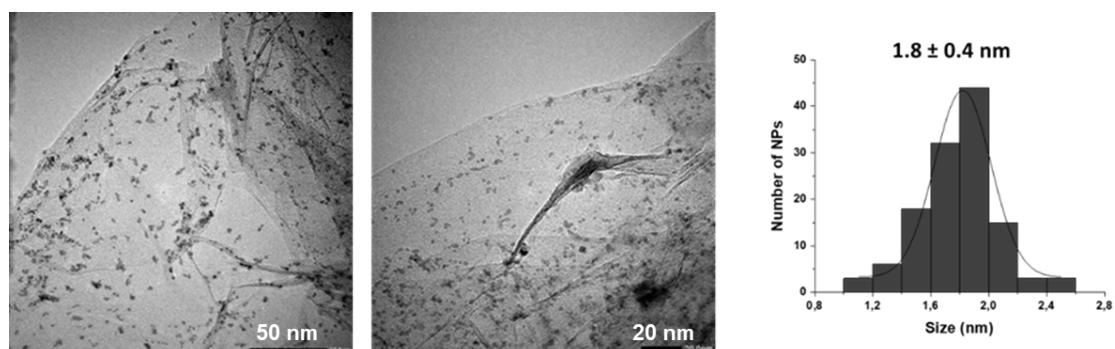

**Figure S19.** TEM images and size histogram of Ru@rGO/pyr-IMes<sub>0.8</sub> after catalysis.

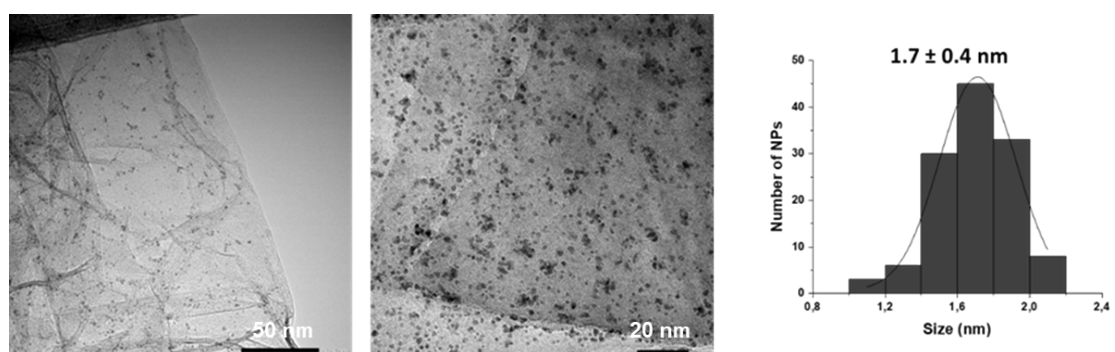

**Figure S20.** TEM images and size histogram of Ru@rGO/pyr-IMes<sub>1</sub> after catalysis.

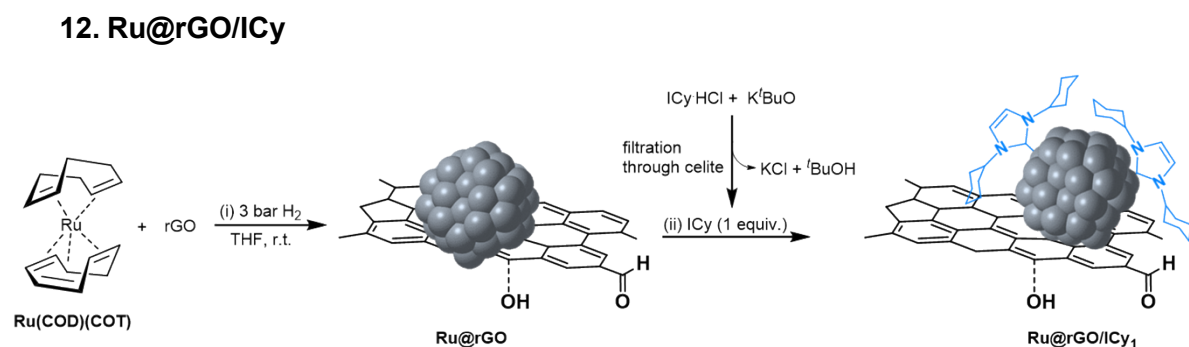

**Figure S21.** Two-step synthetic route followed for the synthesis and subsequent functionalization of Ru@rGO with ICy.

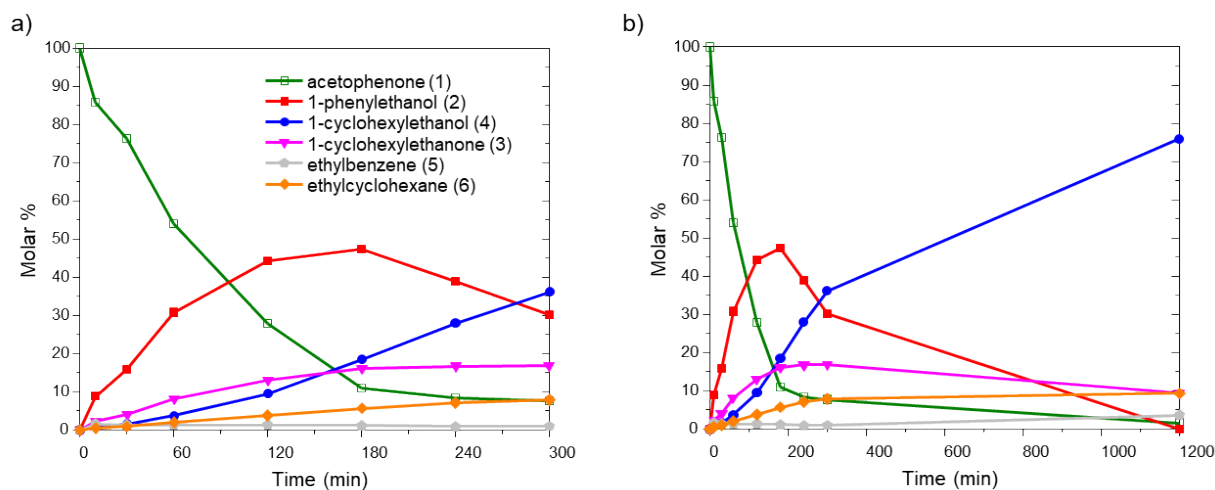

**Figure S22.** Hydrogenation of acetophenone using Ru@rGO/ICy<sub>1</sub> as catalysts at short (a) and long (b) reaction times.

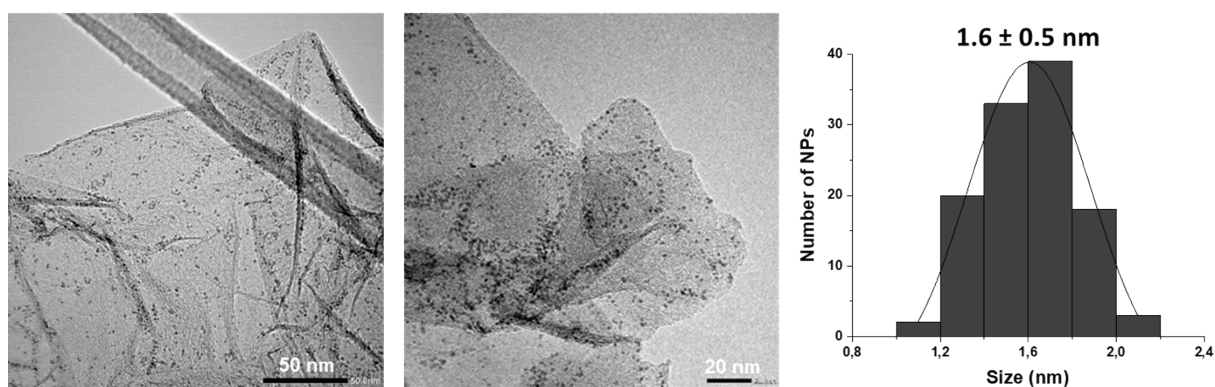

**Figure S23.** TEM images and size histogram of Ru@rGO/ICy<sub>1</sub>.

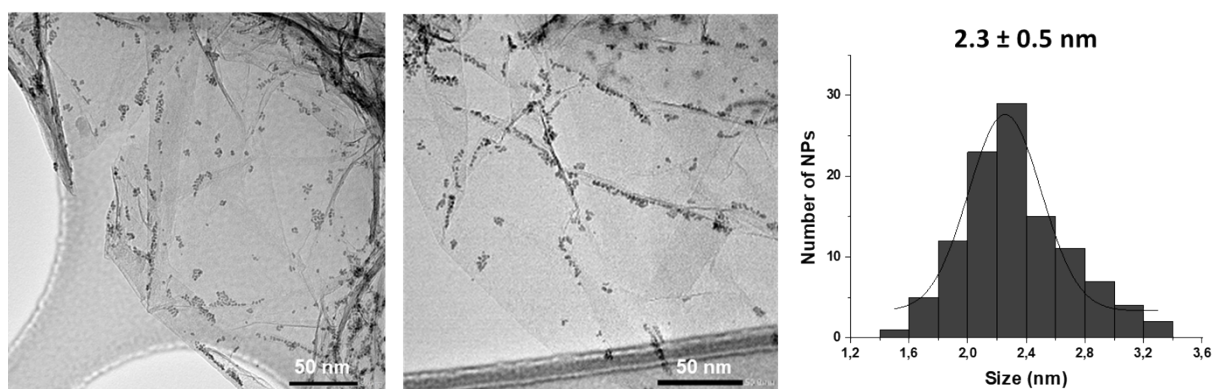

**Figure S24.** TEM images and size histogram of Ru@rGO/ICy<sub>1</sub> after catalysis.

### 13. Multiple addition experiment

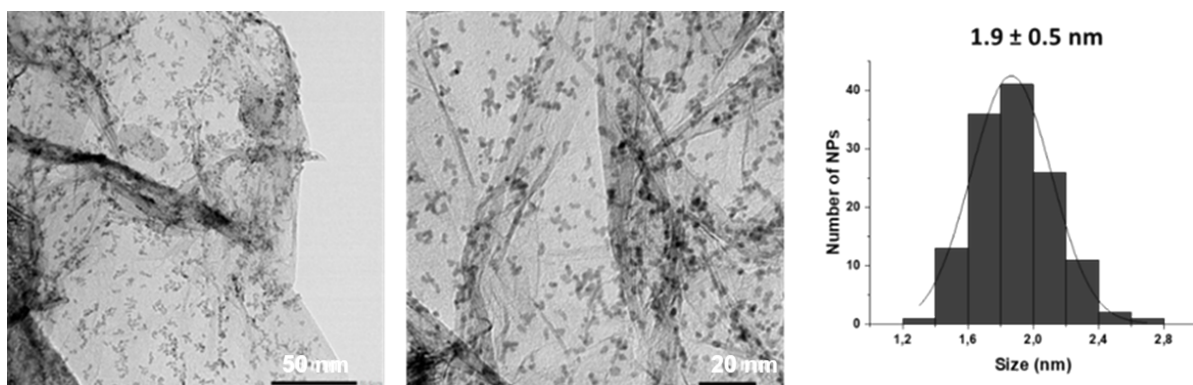

**Figure S25.** TEM images and size histogram of **Ru@rGO/pyr-IMes<sub>0.5</sub>** after multiple addition catalysis.

### 14. “Hot Filtration”

**Table S3.** Conversions of **Ru@rGO/pyr-IMes<sub>0.5</sub>** in acetophenone hydrogenation after thermal filtration<sup>a</sup> and in the presence of catalyst.<sup>b</sup>

| Catalyst                                         | 2h   | 4 h  |
|--------------------------------------------------|------|------|
| <b>Ru@rGO/pyr-IMes<sub>0.5</sub><sup>a</sup></b> | 59 % | 59 % |
| <b>Ru@rGO/pyr-IMes<sub>0.5</sub><sup>b</sup></b> | 57 % | 88%  |

<sup>1</sup> A. P. Umpierre, E. de Jesús and J. Dupont, *ChemCatChem*, 2011, **3**, 1413.
